# Supplementary material for: Sulfated Hydrogels as Primary Intervertebral Disc Cell Culture Systems
Source: MDPI journal article supplement (doi:10.3390/gels10050330), 2024-05-14
Supplement: s1 [file s1]

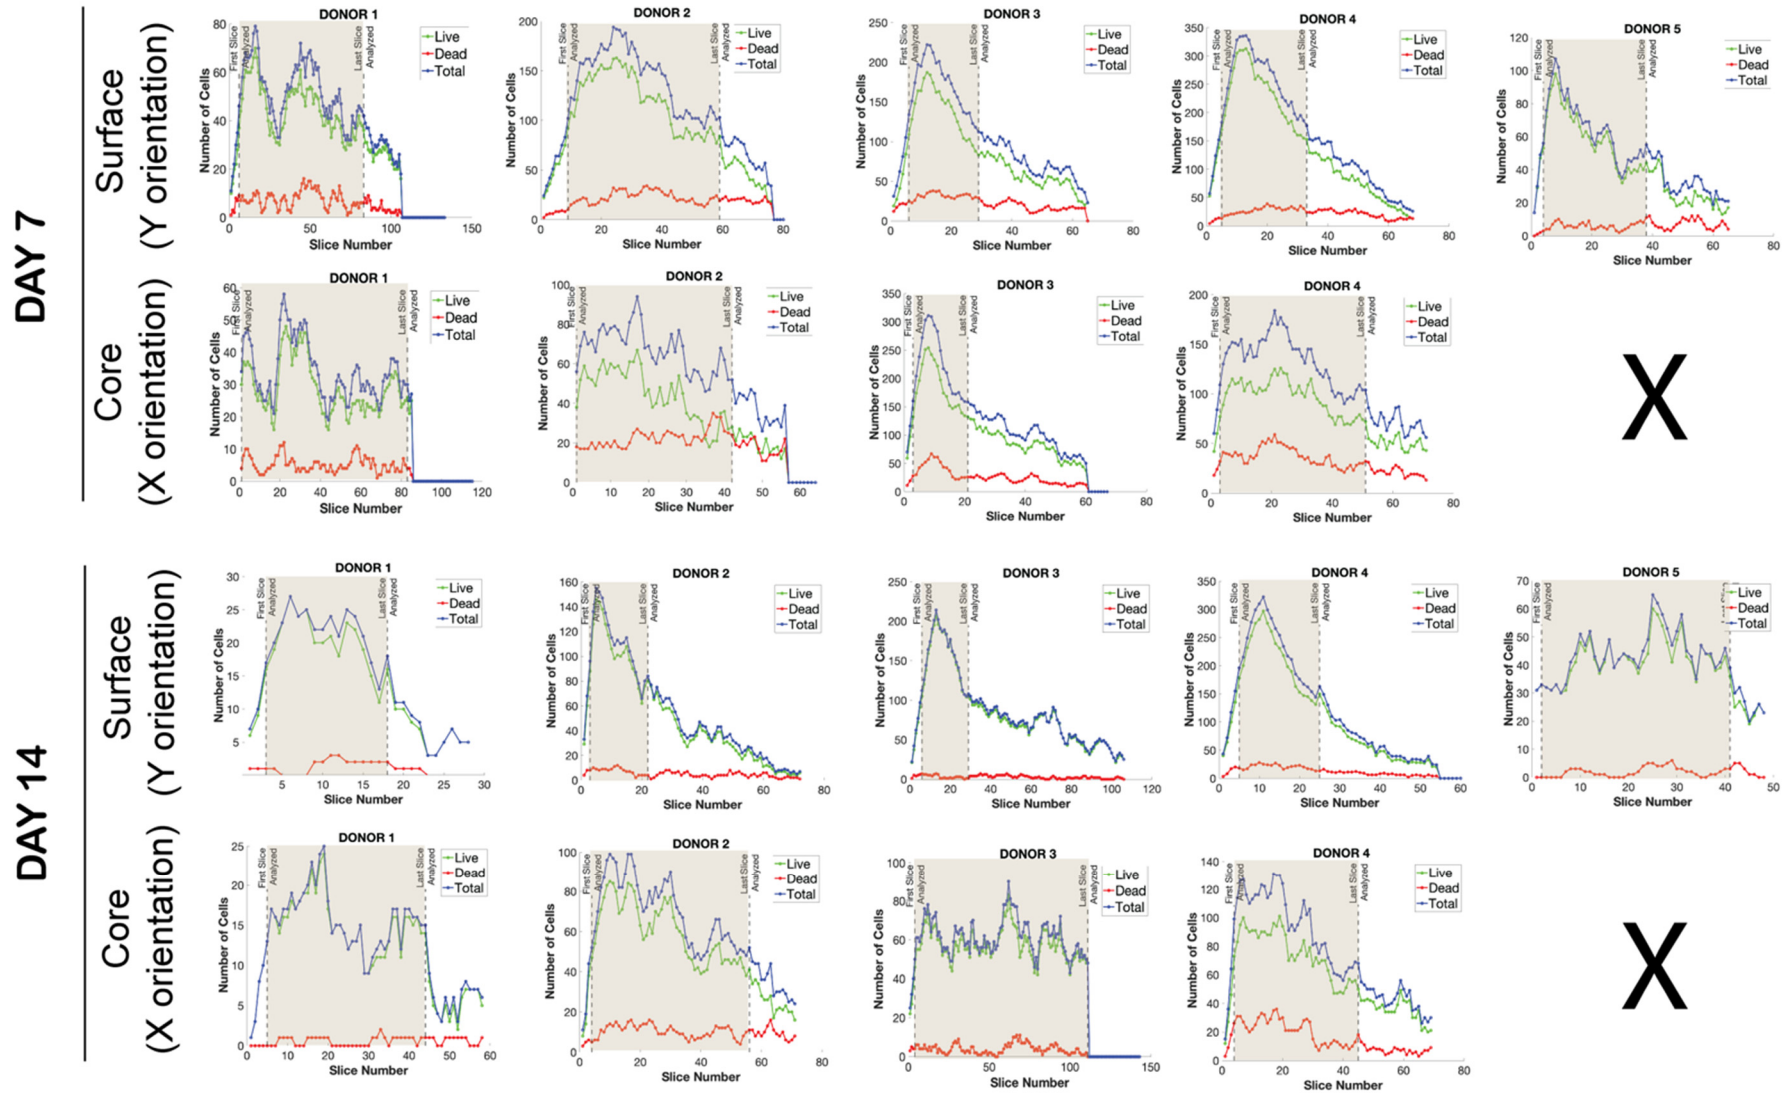

**Figure S1.** Collected and examined (shaded region) confocal slice stacks in the surface (Y orientation) and core (X orientation) of standard alginate carriers after seven and 14 days of culture. Green= Living cell amount; Red= Dead cell amount; Blue= Total cell amount
