# Supplementary material for: Sulfated Hydrogels as Primary Intervertebral Disc Cell Culture Systems
Source: MDPI journal article supplement (doi:10.3390/gels10050330), 2024-05-14
Supplement: s1 [file s1]

**Table S1.** Average density of human NP cells in Standard, 0.1% DS and 0.2% DS alginate.

| Biomaterial          | Location | Timepoint<br>[Days] | Density Average<br>[cells/ carrier] | ± Standard<br>Deviation |
|----------------------|----------|---------------------|-------------------------------------|-------------------------|
| Standard<br>Alginate | Surface  | 7                   | $2.78 \times 10^5$                  | $1.70 \times 10^5$      |
|                      | Core     | 7                   | $2.31 \times 10^5$                  | $1.69 \times 10^5$      |
|                      | Surface  | 14                  | $2.22 \times 10^5$                  | $1.76 \times 10^5$      |
|                      | Core     | 14                  | $1.23 \times 10^5$                  | $6.75 \times 10^5$      |
| 0.1% DS Alginate     | Surface  | 7                   | $1.79 \times 10^5$                  | $9.03 \times 10^4$      |
|                      | Core     | 7                   | $1.32 \times 10^5$                  | $3.60 \times 10^4$      |
|                      | Surface  | 14                  | $1.54 \times 10^5$                  | $4.49 \times 10^4$      |
|                      | Core     | 14                  | $1.24 \times 10^5$                  | $4.06 \times 10^4$      |
| 0.2 % DS Alginate    | Surface  | 7                   | $7.13 \times 10^4$                  | $2.63 \times 10^4$      |
|                      | Surface  | 14                  | $4.68 \times 10^4$                  | $6.45 \times 10^3$      |
